# Supplementary material for: MACRPO: Multi-agent cooperative recurrent policy optimization
Source: Frontiers journal article supplement (doi:10.3389/frobt.2024.1394209), 2024-12-20
Supplement: Data_Sheet_1.pdf [file Data_Sheet_1.pdf]

## 1 NOMENCLATURE

This section defines the symbols and variables used throughout the manuscript.

**Table 1.** List of symbols and variables used in the manuscript.

| Symbol       | Definition                                                                                      |
|--------------|-------------------------------------------------------------------------------------------------|
| $o_i^t$      | Observation of agent $i$ at time-step $t$ .                                                     |
| $u_i^t$      | Action taken by agent $i$ at time-step $t$ .                                                    |
| $r_i^t$      | Reward received by agent $i$ at time-step $t$ .                                                 |
| $v_i^t$      | Value function for agent $i$ at time-step $t$ .                                                 |
| $\pi_i$      | Policy of agent $i$ .                                                                           |
| $\beta$      | Cooperation control parameter for adjusting the level of cooperation between agents.            |
| $\mu^k$      | Meta-trajectory for episode $k$ , combining observations, actions, and rewards from all agents. |
| $T$          | Length of an episode.                                                                           |
| $N$          | Number of agents in the environment.                                                            |
| $D_C$        | Training dataset for the critic network, containing meta-trajectories.                          |
| $\delta_i^t$ | Temporal difference (TD) error for agent $i$ at time-step $t$ .                                 |
| $R_i$        | Discounted return for agent $i$ .                                                               |
| $A_i$        | Advantage function for agent $i$ .                                                              |

## 2 DETAILED ENVIRONMENT DESCRIPTIONS

### 2.1 DeepDrive-Zero Environment:

The observation space is a vector with continuous values. Each agent in the environment receives some information about itself, as well as information from other agents. This information can come from some modules like Perception, Localization, and HDMap in a self-driving car and be used by the decision-making and control modules. The observation vector for each agent contains some information about the agent itself like distance and angle to waypoints, velocity, acceleration, and distance to the left and right lanes, and also some information about the other agents like the relative velocity of the other agent to the ego agent, velocity and acceleration of the other car, angles to corners of the other agent, and distance to corners of the other agent.

Each action vector element is continuous from -1 to 1: steering, acceleration, and braking. Negative acceleration can be used to reverse the car, and the network outputs are scaled to reflect physically realistic values. This environment also has a discretized version that we used in discrete action methods.

The reward function is a weighted sum of several terms like speed, reaching the destination, collision, G-force, jerk, steering angle change, acceleration change, and staying in the lane. Initially, we used 0.5, 1, 4,  $1 \times 10^{-7}$ ,  $6 \times 10^{-6}$ , 0.0001, 0.0001, 0.001 as weights, then used curriculum learning to smooth the driving behavior.

### 2.2 Multi-Walker Environment:

To keep the package balanced and move it as far to the right as possible, the walkers must coordinate their movements. A positive reward is given to each walker locally, based on the change in the package distance summed with 130 times the change in the walker's position. A walker is given a reward of -100 if

they fall, and all walkers receive a reward of -100 if the package falls while moving forward has a reward of 1. By default, the environment is done whenever a walker or package falls or when the walkers reach the edge of the terrain. The action space is continuous, with four values for torques applied to each walker's leg. The observation vector for each walker is a 32-dimensional vector that contains information about nearby walkers as well as data from some noisy LiDAR sensors.

## 2.3 Cooperative Navigation in Particle Environment:

We assign each agent a landmark and calculate its local reward based on its proximity to its landmark and collisions with other agents. As a result, agents will have different reward values; not one shared reward. Each agent's observation data is its position and velocity, as well as the relative position of other agents and landmarks. There are five discrete actions in the action space: up, down, left, right, and no move. After 25 time-steps, the episode ends.

## 3 COMPARISON TO STATE OF THE ART METHODS

To get a better idea of the performance of the state-of-the-art algorithms, the mean episode reward for different baseline algorithms in test environments is shown in Fig. 1, Fig. 2, and Fig. 3.

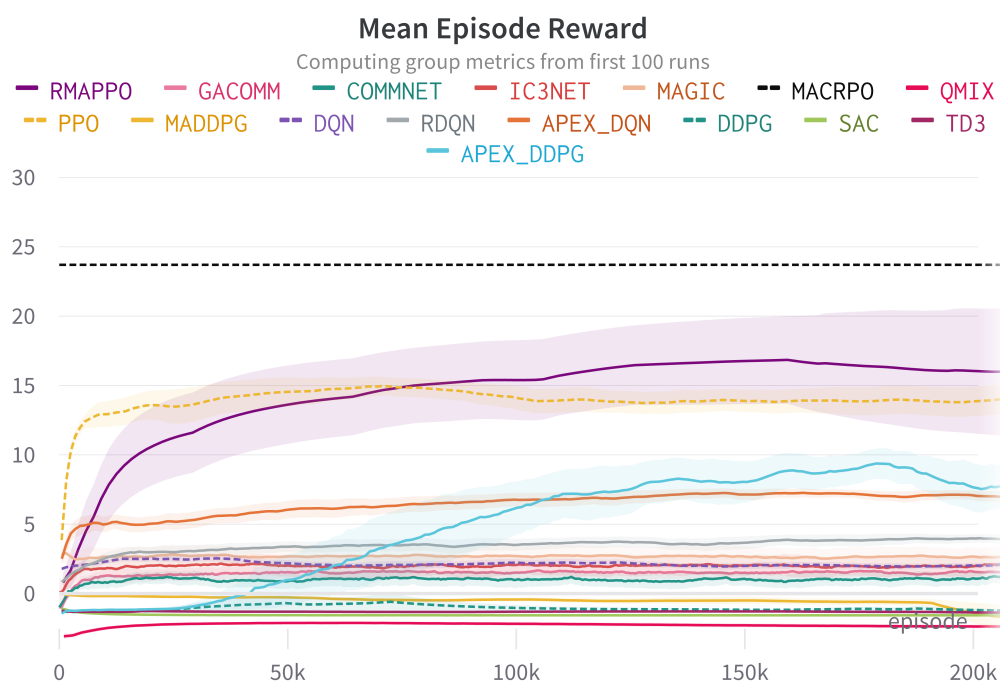

**Figure 1.** Analysis of baseline algorithms in the DeepDrive-Zero environment proposed in Terry et al. (2020). The shaded area shows one standard deviation.

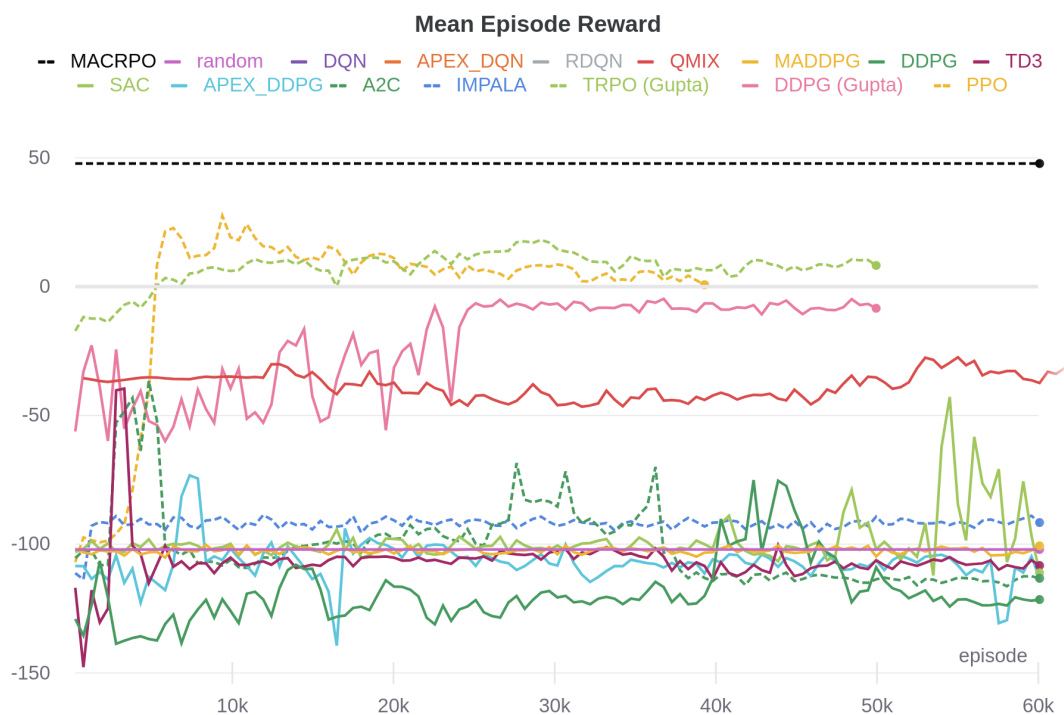

**Figure 2.** Analysis of baseline algorithms in the Multi-Walker environment proposed in Terry et al. (2020). The shaded area shows one standard deviation.

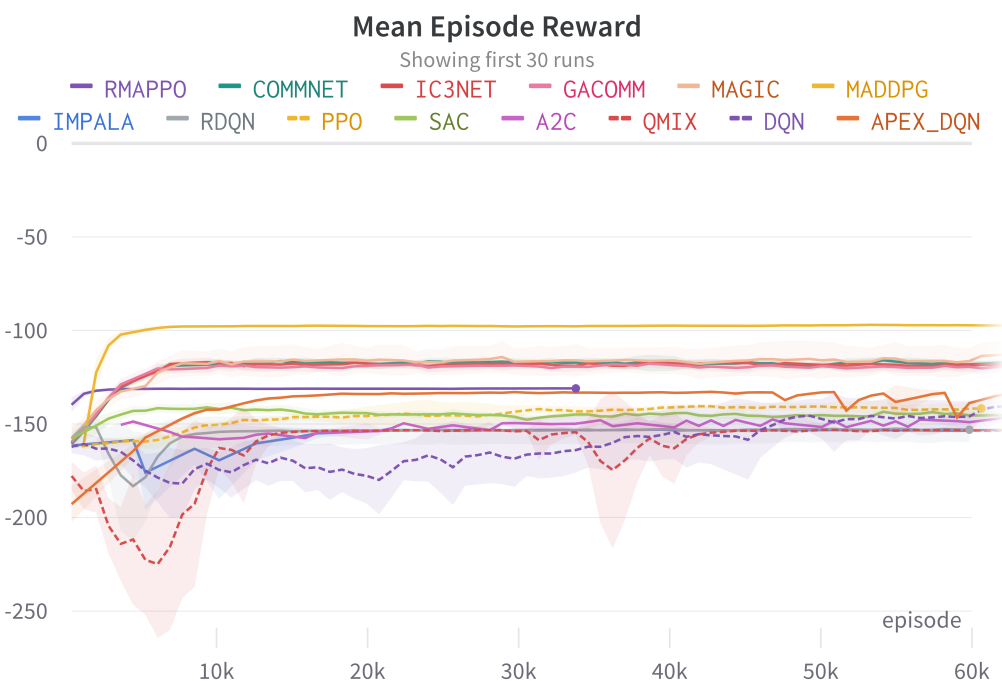

**Figure 3.** Analysis of baseline algorithms in the Particle environment proposed in Terry et al. (2020). The shaded area shows one standard deviation.

## 4 HYPERPARAMETERS

Hyperparameters used in MACRPO for three environments are described in Table 2.

**Table 2.** MACRPO hyperparameters for three MARL environments

| Param.                                | DeepDrive-Zero | Multi-Walker | Particle |
|---------------------------------------|----------------|--------------|----------|
| actor hidden size                     | 64             | 32           | 128      |
| critic hidden size                    | 128            | 32           | 128      |
| batch size                            | 512            | 32           | 1500     |
| discount                              | 0.99           | 0.99         | 0.99     |
| GAE lambda                            | 0.94           | 0.95         | 0.95     |
| PPO clip                              | 0.15           | 0.3          | 0.2      |
| PPO epochs                            | 4              | 4            | 10       |
| max grad norm                         | 1.0            | 1.0          | 1.0      |
| entropy factor                        | 0.001          | 0.01         | 0.01     |
| learning rate                         | 0.0002         | 0.001        | 0.005    |
| recurrent sequence length (time-step) | 20             | 40           | 3        |
| no. of recurrent layers               | 1              | 1            | 1        |

The architecture and hyperparameters used for other baselines are taken from Terry et al. (2020) with some fine-tuning to get better performance, and are shown in Tables 3, 4, and 5. Some hyperparameter values are constant across all RL methods for all environments. These constant values are reported in Table 6. We used the source code for all algorithms from Terry et al. (2020) except for MADDPG, which we used the original implementation (Lowe et al., 2017).

## REFERENCES

- Lowe, R., Wu, Y. I., Tamar, A., Harb, J., Abbeel, O. P., and Mordatch, I. (2017). Multi-agent actor-critic for mixed cooperative-competitive environments. In *Advances in neural information processing systems*. 6379–6390
- Terry, J. K., Grammel, N., Hari, A., Santos, L., Black, B., and Manocha, D. (2020). Parameter sharing is surprisingly useful for multi-agent deep reinforcement learning. *arXiv preprint arXiv:2005.13625*

**Table 3.** Hyperparameters for three MARL environments

| RL method | Hyperparameter             | DeepDrive-Zero                                                           | Multi-Walker                                                             | Particle                                                                 |
|-----------|----------------------------|--------------------------------------------------------------------------|--------------------------------------------------------------------------|--------------------------------------------------------------------------|
| PPO       | sample_batch_size          | 100                                                                      | 100                                                                      | 100                                                                      |
|           | train_batch_size           | 5000                                                                     | 5000                                                                     | 5000                                                                     |
|           | sgd_minibatch_size         | 500                                                                      | 500                                                                      | 1000                                                                     |
|           | lambda                     | 0.95                                                                     | 0.95                                                                     | 0.95                                                                     |
|           | kl_coeff                   | 0.5                                                                      | 0.5                                                                      | 0.5                                                                      |
|           | entropy_coeff              | 0.01                                                                     | 0.01                                                                     | 0.001                                                                    |
|           | num_sgd_iter               | 10                                                                       | 10                                                                       | 50                                                                       |
|           | vf_clip_param              | 10.0                                                                     | 10.0                                                                     | 1.0                                                                      |
|           | clip_param                 | 0.1                                                                      | 0.1                                                                      | 0.5                                                                      |
|           | vf_share_layers            | True                                                                     | True                                                                     | True                                                                     |
|           | clip_rewards               | True                                                                     | True                                                                     | False                                                                    |
|           | batch_mode                 | truncate_episodes                                                        | truncate_episodes                                                        | truncate_episodes                                                        |
| IMPALA    | sample_batch_size          | 20                                                                       | 20                                                                       | 20                                                                       |
|           | train_batch_size           | 512                                                                      | 512                                                                      | 512                                                                      |
|           | lr_schedule                | [[0, 5e-3], [2e7, 1e-12]]                                                | [[0, 5e-3], [2e7, 1e-12]]                                                | [[0, 5e-3], [2e7, 1e-12]]                                                |
|           | clip_rewards               | True                                                                     | True                                                                     | False                                                                    |
| A2C       | sample_batch_size          | 20                                                                       | 20                                                                       | 20                                                                       |
|           | train_batch_size           | 512                                                                      | 512                                                                      | 512                                                                      |
|           | lr_schedule                | [[0, 7e-3], [2e7, 1e-12]]                                                | [[0, 7e-3], [2e7, 1e-12]]                                                | [[0, 7e-3], [2e7, 1e-12]]                                                |
| SAC       | sample_batch_size          | 20                                                                       | 20                                                                       | 20                                                                       |
|           | train_batch_size           | 512                                                                      | 512                                                                      | 512                                                                      |
|           | Q_model                    | {activation:<br>relu,<br>layer_sizes:<br>[266, 256]}                     | {activation:<br>relu,<br>layer_sizes:<br>[266, 256]}                     | {activation:<br>relu,<br>layer_sizes:<br>[266, 256]}                     |
|           | optimization               | {actor_lr:<br>0.0003,<br>actor_lr:<br>0.0003,<br>entropy_lr:<br>0.0003,} | {actor_lr:<br>0.0003,<br>actor_lr:<br>0.0003,<br>entropy_lr:<br>0.0003,} | {actor_lr:<br>0.0003,<br>actor_lr:<br>0.0003,<br>entropy_lr:<br>0.0003,} |
|           | clip_actions               | False                                                                    | False                                                                    | False                                                                    |
|           | exploration_enabled        | True                                                                     | True                                                                     | True                                                                     |
|           | no_done_at_end             | True                                                                     | True                                                                     | True                                                                     |
|           | normalize_actions          | False                                                                    | False                                                                    | False                                                                    |
|           | prioritized_replay         | False                                                                    | False                                                                    | False                                                                    |
|           | soft_horizon               | False                                                                    | False                                                                    | False                                                                    |
|           | target_entropy             | auto                                                                     | auto                                                                     | auto                                                                     |
|           | tau                        | 0.005                                                                    | 0.005                                                                    | 0.005                                                                    |
|           | n_step                     | 1                                                                        | 1                                                                        | 5                                                                        |
|           | evaluation_interval        | 1                                                                        | 1                                                                        | 1                                                                        |
|           | metrics_smoothing_episodes | 5                                                                        | 5                                                                        | 5                                                                        |
|           | target_network_update_freq | 1                                                                        | 1                                                                        | 1                                                                        |
|           | learning_starts            | 1000                                                                     | 1000                                                                     | 1000                                                                     |
|           | timesteps_per_iteration    | 1000                                                                     | 1000                                                                     | 1000                                                                     |
|           | buffer_size                | 100000                                                                   | 100000                                                                   | 100000                                                                   |

**Table 4.** Hyperparameters for DeepDrive-Zero, Multi-Walker, and Particle environments

| RL method   | Hyperparameter     | DeepDrive-Zero    | Multi-Walker      | Particle          |
|-------------|--------------------|-------------------|-------------------|-------------------|
| APEX-DQN    | sample_batch_size  | 20                | 20                | 20                |
|             | train_batch_size   | 32                | 512               | 5000              |
|             | learning_starts    | 1000              | 1000              | 1000              |
|             | buffer_size        | 100000            | 100000            | 100000            |
|             | dueling            | True              | True              | True              |
|             | double_q           | True              | True              | True              |
| Rainbow-DQN | sample_batch_size  | 20                | 20                | 20                |
|             | train_batch_size   | 32                | 512               | 1000              |
|             | learning_starts    | 1000              | 1000              | 1000              |
|             | buffer_size        | 100000            | 100000            | 100000            |
|             | n_step             | 2                 | 2                 | 2                 |
|             | num_atoms          | 51                | 51                | 51                |
|             | v_min              | 0                 | 0                 | 0                 |
|             | v_max              | 1500              | 1500              | 1500              |
|             | prioritized_replay | True              | True              | True              |
|             | dueling            | True              | True              | True              |
|             | double_q           | True              | True              | True              |
|             | parameter_noise    | True              | True              | True              |
|             | batch_mode         | complete_episodes | complete_episodes | complete_episodes |
| Plain DQN   | sample_batch_size  | 20                | 20                | 20                |
|             | train_batch_size   | 32                | 512               | 5000              |
|             | learning_starts    | 1000              | 1000              | 1000              |
|             | buffer_size        | 100000            | 100000            | 100000            |
|             | dueling            | False             | False             | False             |
|             | double_q           | False             | False             | False             |
| QMIX        | buffer_size        | 10000             | 3000              | 100000            |
|             | gamma              | 0.99              | 0.99              | 0.99              |
|             | critic_lr          | 0.001             | 0.0005            | 0.001             |
|             | lr                 | 0.001             | 0.0005            | 0.001             |
|             | grad_norm_clip     | 10                | 10                | 10                |
|             | optim_alpha        | 0.99              | 0.99              | 0.99              |
|             | optim_eps          | 0.00001           | 0.05              | 0.00001           |
|             | epsilon_finish     | 0.02              | 0.05              | 0.02              |
|             | epsilon_start      | 1.0               | 1.0               | 1.0               |
| MADDPG      | lr                 | 0.001             | 0.0001            | 0.01              |
|             | batch_size         | 64                | 512               | 500               |
|             | num_envs           | 1                 | 64                | 1                 |
|             | num_cpus           | 1                 | 8                 | 1                 |
|             | buffer_size        | 1e5               | 1e5               | 1e5               |
|             | steps_per_update   | 4                 | 4                 | 4                 |

**Table 5.** Hyperparameters for DeepDrive-Zero and Multi-Walker

| RL method  | Hyperparameter                | DeepDrive-Zero | Multi-Walker |
|------------|-------------------------------|----------------|--------------|
| APEX-DDPG  | sample_batch_size             | 20             | 20           |
|            | train_batch_size              | 512            | 512          |
|            | lr                            | 0.0001         | 0.0001       |
|            | beta_annealing_fraction       | 1.0            | 1.0          |
|            | exploration_fraction          | 0.1            | 0.1          |
|            | final_prioritized_replay_beta | 1.0            | 1.0          |
|            | n_step                        | 3              | 3            |
|            | prioritized_replay_alpha      | 0.5            | 0.5          |
|            | learning_starts               | 1000           | 1000         |
|            | buffer_size                   | 100000         | 100000       |
|            | target_network_update_freq    | 50000          | 50000        |
|            | timesteps_per_iteration       | 2500           | 25000        |
| Plain DDPG | sample_batch_size             | 20             | 20           |
|            | train_batch_size              | 512            | 512          |
|            | learning_starts               | 5000           | 5000         |
|            | buffer_size                   | 100000         | 100000       |
|            | critics_hidden                | [256, 256]     | [256, 256]   |
| TD3        | sample_batch_size             | 20             | 20           |
|            | train_batch_size              | 512            | 512          |
|            | critics_hidden                | [256, 256]     | [256, 256]   |
|            | learning_starts               | 5000           | 5000         |
|            | pure_exploration_steps        | 5000           | 5000         |
|            | buffer_size                   | 100000         | 100000       |

**Table 6.** Variables set to constant values across all RL methods for all environments

| Variable          | Value set in all RL methods |
|-------------------|-----------------------------|
| # worker threads  | 8                           |
| # envs per worker | 8                           |
| gamma             | 0.99                        |
| MLP hidden layers | [400, 300]                  |
